# Supplementary material for: A Facile Two-Step Thermal Process for Producing Dense Phase Pure Cubic Ta-Doped Lithium Lanthanum Zirconium Oxide Electrolyte for Upscaling
Source: Preprints.org preprint supplement (doi:10.20944/preprints202310.1065.v1), 2023-10-18
Supplement: Supplementary file 1 [file supplementary]

**Supporting information**

A facile two-step thermal process for producing dense phase pure cubic Ta-doped lithium lanthanum zirconium oxide electrolyte for upscaling

Diwakar Karuppiah 1,2,*, Dmitrii Komissarenko 1,3, Nur Sena Yüzbasi 1, Yang Liu 1, Pradeep Vallachira Warriam Sasikumar 1,4, Amir Hadian 1,3, Thomas Graule, Frank Clemens 1, Gurdial Blugan 1,*

1 Laboratory for High-Performance Ceramics, Empa, Swiss Federal Laboratories for Materials Science and Technology, CH-8600, Dübendorf, Switzerland

2 Department of Mechanical Engineering Applied Mechanics, University of Pennsylvania, Philadelphia, PA 19104, USA

3 University of Applied Sciences and Arts Northwestern Switzerland (FHNW), CH-5210 Windisch,
Switzerland

4 ADVANO, Lakeshore Drive, New Orleans, LA 70112, USA

***** Correspondence: [diwakarkaruppiah92@gmail.com](mailto:diwakarkaruppiah92@gmail.com) and [gurdial.blugan@empa.ch](mailto:gurdial.blugan@empa.ch)

**Fig. S1** Schematic representation of the experimental process of Ta:LLZO.

**Fig. S2(a-d)** TG and DTA of wet milled La2O3, Ta2O5, ZrO2 and Li2CO3 ­powder.
